# **Inhibition of mitochondrial fission preserves photoreceptors after retinal detachment**

Xiangjun She<sup>1</sup>, Xinmin Lu<sup>1</sup>, Tong Li<sup>1</sup>, Junran Sun<sup>1</sup>, Jian Liang<sup>1,2</sup>, Yuanqi Zhai<sup>1,3</sup>,  
Shiqi Yang<sup>1</sup>, Qing Gu<sup>2</sup>, Fang Wei<sup>2</sup>, Hong Zhu<sup>1,3</sup>, Fenghua Wang<sup>1,3</sup>, Xueting Luo<sup>1,2\*</sup>,  
Xiaodong Sun<sup>1,2,3\*</sup>

<sup>1</sup>Department of Ophthalmology, Shanghai General Hospital (Shanghai First People's  
Hospital), Shanghai Jiao Tong University School of Medicine, Shanghai, China

<sup>2</sup>Shanghai Key Laboratory of Fundus Diseases, Shanghai, China

<sup>3</sup>Shanghai Engineering Center for Visual Science and Photomedicine, Shanghai,  
China

**Short title:** Mitochondrial Dynamic correlated with Retinal Degeneration

## **Keywords:**

apoptosis; dynamin-related protein 1; mitochondrial fission; retinal detachment

**Author contributions:** X. She, F. Wang, X. Luo and X. Sun contributed to the study  
design, data analysis and manuscript preparation; X. She, T. Li, J. Sun, J. Liang, Y.  
Zhai, S. Yang, Q. Gu ,X Lu and F. Wei performed experiments; H. Zhu contributed to  
study design and data analysis.

23 \*To whom correspondence should be addressed:

24 Xiaodong Sun, [xdsun@sjtu.edu.cn](mailto:xdsun@sjtu.edu.cn)

25 Xueting Luo, [xtluo@sjtu.edu.cn](mailto:xtluo@sjtu.edu.cn).

26

27 **Abstract:**

28 Photoreceptor degeneration is a leading cause of visual impairment worldwide.  
 29 Separation of neurosensory retina from the underlying retinal pigment epithelium is a  
 30 prominent feature preceding photoreceptor degeneration in a variety of retinal  
 31 diseases. Although ophthalmic surgeries have been well developed to restore retinal  
 32 structures, post-op patients usually experience progressive photoreceptor degeneration  
 33 and irreversible vision loss that is incurable at present. Previous studies point to a  
 34 critical role of mitochondria-mediated apoptotic pathway in photoreceptor  
 35 degeneration, but the upstream triggers remain largely unexplored. In this study, we  
 36 show that after experimental RD induction, photoreceptors activate dynamin-related  
 37 protein 1 (Drp1)-dependent mitochondrial fission pathway and subsequent apoptotic  
 38 cascades. Mechanistically, endogenous ROS is necessary for Drp1 activation in vivo  
 39 and exogenous ROS insult is sufficient to activate Drp1-dependent mitochondrial  
 40 fission in cultured photoreceptors. Accordingly, inhibition of Drp1 activity effectively  
 41 preserves mitochondrial integrity and rescues photoreceptors. Collectively, our data  
 42 delineates a ROS-Drp1-mitochondria axis that promotes photoreceptor degeneration  
 43 in retinal diseased models.

44

## 45 **Introduction**

46 Photoreceptors are light-sensing neurons responsible for visual signal reception.  
 47 (Nakanishi, 1995) Due to sustained photo-transduction and oxidative stress,(Ahmed et  
 48 al., 1993) photoreceptors are among the most metabolically active and  
 49 energy-demanding tissues in the central nervous system.(Okawa et al., 2008)  
 50 However, the outer retina, where photoreceptors reside in, mainly depends on retinal  
 51 pigment epithelium layer and choroid vascular bed underneath for nutrition and  
 52 oxygen to survive.(Linsenmeier and Padnick-Silver, 2000)(Luo et al., 2013). Such  
 53 unique organization makes photoreceptors exceptionally vulnerable to metabolic  
 54 perturbations under stressed conditions including rhegmatogenous retinal detachment  
 55 (RD), tractional diabetic retinopathy and age-related macular degeneration.(Arroyo et  
 56 al., 2005)(Lim et al., 2012) Clinically palliative interventions remain the mainstay to  
 57 halt disease progression, but in the long run patients suffer from progressive vision  
 58 loss due to irreversible photoreceptor death.(Wubben et al., 2016) Therefore,  
 59 development of photoreceptor-targeted neuroprotective strategy is pivotal to preserve  
 60 vision.

61 Photoreceptors degenerate mainly through apoptotic pathway. However,  
 62 inhibition of death effectors does not effectively protect photoreceptors because of  
 63 activation of necrotic pathway.(Murakami et al., 2013) Therefore, elucidation of  
 64 mechanisms leading to photoreceptor degeneration, in particular identification of the  
 65 initial ‘triggers’ upstream of death effectors, is critical to protect photoreceptors.  
 66 Nonetheless, the upstream signals of photoreceptor degeneration remain largely

67 unexplored.

68 Mitochondria are energy-producing organelles that play a central role in cell  
69 death decision.(Vakifahmetoglu-Norberg et al., 2017) Accumulating evidence  
70 suggests that mitochondrial dysfunction precedes neuronal death in neurodegenerative  
71 diseases.(Ishihara et al., 2009) Importantly, decline in mitochondrial metabolism is  
72 associated with age-related photoreceptor degeneration,(Kam et al., 2015) indicating  
73 the importance of mitochondria for photoreceptor survival. To further clarify the role  
74 of mitochondria in photoreceptor degeneration, we employed diseased models both in  
75 vivo and in vitro wherein photoreceptors were exposed to stress. We found that  
76 mitochondrial fission within photoreceptors represented an early event before  
77 activation of death effectors . At the molecular level, we identified Drp1 as the critical  
78 mediator of mitochondrial fission in stressed photoreceptors. ROS was both required  
79 and sufficient to induce Drp1-dependent mitochondrial fission. Moreover, inhibition  
80 of Drp1 substantially preserved mitochondrial integrity and protected photoreceptors  
81 both structurally and functionally. Collectively, our findings have uncovered the  
82 critical role of mitochondria in photoreceptor degeneration and identified Drp1 as a  
83 promising therapeutic target for photoreceptor protection.

84

## 85 **Materials and Methods**

### 86 **Animals and surgery**

87 The biomedical research was approved by the Shanghai General Hospital review  
88 board. All procedures were adhered to the Statement of the Association for Research

89 in Vision and Ophthalmology for using animals in biomedical research. SD rats were  
 90 housed at the Laboratory Animal Center of Shanghai General Hospital. Male rats  
 91 (8-10 weeks; 180-250g) were used to conduct retinal detachment as previous  
 92 description.(Liu et al., 2009) Briefly, the rats were anesthetized by intraperitoneal  
 93 injection with 1% sodium pentobarbital (Sigma-Aldrich, US). Before surgery, pupils  
 94 were dilated with 0.5% tropicamide and 0.5% phenylephrine hydrochloride eye drops  
 95 (Santen Pharmaceutical, Japan). A needle head was used to create a sclerotomy 2mm  
 96 posterior to the limbus. Then a 30-gauge needle was introduced through the  
 97 sclerotomy into the subretinal space. Sodium hyaluronate (10 mg/mL, LG Life  
 98 Sciences, Korea) was injected to make two-thirds of the neurosensory retina detach  
 99 from the underlying RPE. The RD was verified by surgical microscope and only the  
 100 right eye was generated to RD, with left eye serving as control. All animal  
 101 experiments included three to four rats per group and repeated three times.

102

### 103 **Subretinal injections of Mdivi-1 or N-Acetylcysteine**

104 Mdivi-1 (Sigma-Aldrich #338967-87-6) was dissolved in 20% dimethyl sulfoxide  
 105 (DMSO) and then further diluted with 0.9% physiological saline to a working  
 106 concentration of 2.4mg/ml. N-Acetylcysteine (Sigma #A7250) was dissolved in 0.9%  
 107 physiological saline into the working concentration of 200  $\mu$ M or 100  $\mu$ M. 5  $\mu$ L of  
 108 chemicals or vehicle was injected into subretinal space at the time of RD induction.

109

### 110 **Cell Culture**

111 The 661W cell line was maintained in Dulbecco's modified Eagle's medium  
 112 containing 10% fetal bovine serum, 300 mg/L glutamine, 32 mg/L putrescine, 40  
 113 mL/L of b-mercaptoethanol, and 40 mg/L of both hydrocortisone 21-hemisuccinate  
 114 and progesterone. The media also contained penicillin (90 units/mL) and streptomycin  
 115 (0.09 mg/mL). Cells were maintained under regular cell culture chamber. 500  $\mu$ M  
 116 H<sub>2</sub>O<sub>2</sub> was used to mimic the oxidative stress induced model for 24 hours. 50  $\mu$ M  
 117 Mdivi-1 was pretreated to 661 cells for 1 hour before 500  $\mu$ M H<sub>2</sub>O<sub>2</sub> treatment.

118

# 119 **Western blot analysis**

120 The retina or cultured cells were homogenized with lysis buffer containing 50 mM  
 121 Tris 7.4, 150 mM NaCl, 1% Triton X-100, 1% sodium deoxycholate, 0.1% SDS and  
 122 inhibitors of protease (Roche #11679498001) and phosphatase (Sigma #P0044).  
 123 Samples were resolved by SDS-PAGE and transferred to PVDF membranes. Primary  
 124 antibodies used for probing were listed below: phospho-Drp1(Ser616) (Cell Signaling  
 125 Technology, Product #3455), Drp1 (Cell Signaling Technology, Product #14647),  
 126 Cleaved Caspase-3 (Proteintech, Product #25546-1-AP), Bax (Abcam, Product  
 127 #ab32503), VDAC ( Cell Signaling Technology, Product #4866 ) , GAPDH  
 128 (Proteintech , Product #60004) and  $\beta$ -actin (Cell Signaling Technology, Product  
 129 #4970). After HRP-conjugated secondary antibodies and chemiluminescent substrates  
 130 were applied, the signals were detected by Amersham Imager 600 (GE, USA).  
 131 Densitometry was measured and analyzed with Image J 1.48.

132

### 133 **Mitochondrial Fission confocal microscopy**

134 The rats were perfused transcardially with 4% paraformaldehyde. The eyeballs were  
 135 harvested, cryo-sectioned and prepared for immunohistochemistry. 661W cells were  
 136 fixed with 4% paraformaldehyde before staining. Leica TCS SP8 confocal  
 137 microscopy (Leica Microsystems, Wetzlar, Germany) was used to detect V- $\beta$   
 138 antibodies (Abcam #ab14730) labeled mitochondria with an excitation wavelength of  
 139 543nm and an emission wavelength from 575nm to 700nm. The image size was set to  
 140 1024 x 1024 pixels in a scan speed of 100 Hz with a 63X oil immersion lens. The way  
 141 of mitochondrial morphology was analyzed from Rehman et al (Rehman et al.,  
 142 2012). Ten to fifteen cells were captured randomly and the images were analyzed  
 143 using Image J (NIH, Bethesda, MD). Greater than half of mitochondrial displaying  
 144 the long tubular shape is “tubular”, less than half of mitochondrial displaying the  
 145 tubular shape is intermediate and majority of mitochondrial displaying short is  
 146 fragmented shape. (Wang et al., 2015) Fragmentation is defined as number of the  
 147 fragmented mitochondrial in total cells. 100 cells were statistically analyzed by a blind  
 148 observer. (Ballweg et al., 2014)

149

### 150 **Histopathological retinal ONL Damage Assessment**

151 Eyes were enucleated 7 days after retinal detachment. Each group consisted of 3 eyes  
 152 each time and repeated 3 times. Sections (5  $\mu$ m) were in the vertical meridian and  
 153 inferior portion of the eye wall and stained with hematoxylin and eosin. Sections in  
 154 the angle were excluded in our research, because the retinal thickness varies with the

155 distance from the optic nerve, the INL thickness was used to as the internal control at  
156 the same distance from the optic nerve(Dong et al., 2012). 10 points in each section  
157 were measured by skilled observer, five sections were randomly selected in each eye.  
158 The thickness ratio of the ONL to INL was calculated to compare the ONL damage in  
159 each group(Besirli et al., 2010)(Trichonas et al., 2010).

160

### 161 **Transmission electron microscopy**

162 TEM analysis was carried out as described previously(Huang et al., 2014). Briefly,  
163 the retina was fixed in a solution containing 5% formaldehyde, 2% glutaraldehyde in  
164 0.1 M PBS, pH 7.4. The fixed and processed samples were subjected to imaging with  
165 TEM (Zeiss 190). Mitochondrial of photoreceptor were gained randomly in four field  
166 for each sample and the images were digitized and the mitochondrial length was  
167 measured by Image J 1.48 for analysis.

168

### 169 **Mitochondrial isolation**

170 Mitochondrial isolation from retina was performed using a mitochondrial isolation kit  
171 (Beyotime #C3606) according to the instructions. Briefly, dissected retina  
172 homogenized in cold mitochondrial lysis buffer. The homogenate was then  
173 centrifuged at 600g for 10 min at 4 °C to spin down the nuclei and unbroken cells.  
174 The supernatant was collected and centrifuged again at 12,000g for 30 min at 4 °C to  
175 pellet the mitochondria.

176



## 177 **Apoptosis assay**

178 DNA fragmentation was detected using terminal deoxynucleotidyl transferase dUTP  
179 nick end labeling (TUNEL; Roche #11684795910) 24 hours after H<sub>2</sub>O<sub>2</sub> treatment.  
180 TUNEL-positive staining was accounted in 4 random fields for each group and  
181 repeated 3 times.

182

## 183 **Drp1 silencing**

184 661W cells were transfected with siRNA/lipofectamine mixture according to the  
185 manufacturer's instructions (GenePharma, Shanghai, China). We selected four  
186 sequences of siRNA from the pubmed and one sequences of siRNAs proved to be  
187 effective in this study: siDrp1 sense:  
188 5'-AGGAGAAGAAAUGGUAAAUUUCTT-3', siDrp1 antisense:  
189 5'-GAAAUUUACCAUUUUCUUCUCCUTT-3', negative control sense:  
190 5'-UUCUCCGAACGUGUCACGUTT-3', negative control antisense:  
191 5'-ACGUGACACGUUCGGAGAATT-3'. The final concentration of siRNA was 20  
192 pM per well. The media was changed 24h after transfection. Cells were harvested 48  
193 h after transfection. Efficiency of knocking down endogenous Mouse Drp1 was  
194 verified by Western blot, the transfection efficiency is calculated by the expression of  
195 p-Drp1<sup>Ser616</sup> between siDRP1 and control group relative to β-actin.

196

## 197 **Mitochondrial membrane potential assay**

198 Dual-emission potential-sensitive probe JC-1 (Molecular Probes #T3168) was used to

199 measure the mitochondrial membrane potential, 661w cells were washing with cold  
200 PBS after treatment and then incubated with 10  $\mu$ L of JC-1 for 20 minutes at 37° C  
201 according to manufacturer's instructions. After incubation, cells were washed twice  
202 by cold PBS, we measured the red fluorescence with excitation at 525 nm and  
203 emission at 590 nm, the green fluorescence with excitation at 490 nm and emission at  
204 530 nm in a random order and analyzed with Image J 1.48. The ratio of red to green  
205 fluorescence was used to reflect mitochondrial membrane potential.

206

## 207 **Electroretinography**

208 The retinal function was assessed by electroretinograms (ERG) before and 7 days  
209 after retinal detachment. The rats were pretreated overnight dark adaptation, the rats  
210 were anesthetized and pupil were dilated as previously introduced. The body  
211 temperature was set to 37° C with a heating pad during the procedure, a gold wire  
212 electrode was on the corneal, reference electrode was at the head and a ground  
213 electrode in the tail. All the procedure was in dim red light. The response to a light  
214 flash (3.0 candela seconds/m<sup>2</sup>) from a photic stimulation was amplified, the  
215 preamplifier bandwidth was set at 0.2 to 300 Hz. The a-wave amplitude was from  
216 baseline to the maximum a-wave. The amplitude of b-wave was measured from the  
217 maximum a-wave to the maximum b-wave peak. The ratio of a or b wave to baseline  
218 was used to evaluate the retinal function.

219

## 220 **Statistics Analysis**

221 Data were shown as mean  $\pm$  SD , Difference in 2 groups were analyzed by Unpaired  
222 Student's t-Test, the mitochondrial length, ERG data in three or more groups were  
223 analyzed by one-way ANOVA with Bonferroni coefficient, mitochondrial morphology  
224 were analyzed by chi-square test by computer software (SPSS 21.0 for windows ;  
225 SPSS Inc., Chicago, IL). A p value  $<0.05$  was considered as significant.

226

## 227 **Results**

### 228 **Mitochondrial fission is evident in the photoreceptors after experimental RD**

229 Mitochondria, structurally dynamic organelles, undergoes constant fusion and  
230 fission to regulate their homeostasis (Westermann, 2010). Increased mitochondrial  
231 fission is associated with functional deficiency under diseased conditions (Archer,  
232 2013). To directly visualize mitochondria morphology in vivo, we employed  
233 transmission electron microscopy (TEM) to analyze the retinal tissues of rats on the  
234 third day after experimental RD. As shown in Fig. 1A & 1B, the mitochondria within  
235 photoreceptors appeared to be fragmented, punctate and scattered as compared to the  
236 typically long and interconnected structures in untreated control. We also labeled the  
237 mitochondria with antibodies against COX-V  $\beta$  subunit (V- $\beta$ ) for analysis of  
238 mitochondrial morphology with confocal microscopy. In normal photoreceptors,  
239 rod-like structures in various lengths were readily detectable. However, punctate and  
240 dispersed mitochondrial signals dominated the diseased photoreceptors after RD (Fig.  
241 1C & 1D). We artificially divided the mitochondria into three species (i.e. long,  
242 intermediate and tubular) based on their morphology and further assessed the

243 distribution of mitochondrial structures (Picard et al., 2013). Consistent with previous  
244 TEM analysis, the amount and proportion of short mitochondrial species increased  
245 substantially with concurrent decrease of intermediate and long species moderately in  
246 photoreceptors after RD (Fig. 1C & 1D).

247

## 248 **Drp1 activation is critical to mitochondrial fission and subsequent photoreceptor** 249 **death**

250 Drp1 is the essential mediator of mitochondrial fission and its phosphorylation is  
251 associated with activation of the mitochondrial fission pathway (Kashatus et al.,  
252 2015). In order to assess whether Drp1 is involved in the process of mitochondrial  
253 fission in photoreceptors after RD, we dissected out the retina for analysis by Western  
254 blot. As showed in Fig. 1E and Fig.1F, Drp1 appeared to be phosphorylated abruptly  
255 after injury. The p-Drp1 signal peaked within one day after RD followed by gradual  
256 decline, suggesting a potential role of Drp1 in RD-induced mitochondrial fission in  
257 photoreceptors. Thus, We conclude that RD induced Drp1 activation and  
258 mitochondrial fission in the photoreceptors.

259

## 260 **Inhibition of Drp1 attenuates mitochondrial fission and photoreceptor** 261 **degeneration after RD**

262 Apoptosis is the primary pathway through which photoreceptors degenerate  
263 (Murakami et al., 2013). Consistently, we detected significant up-regulation of  
264 Caspase-3 activity at 3 days after RD (Fig. 1E & 1G). Since activation of Drp1

preceded expression of Caspase-3 (Fig. 1F & 1G), we imply that Drp1-mediated mitochondrial fission may serve as upstream signals regulating the apoptotic pathway in photoreceptors after RD. To further verify this hypothesis, we subretinally administered Mdivi-1, a highly selective inhibitor for Drp1 (Tanaka and Youle, 2008), at the time of RD induction. As expected, treatment with Mdivi-1 attenuated RD-induced mitochondrial fission and effectively preserved mitochondrial integrity in the photoreceptors after RD as determined by TEM (Fig. 2A & 2B). Next, we analyzed the activity of apoptotic factors in the retinal tissues. Notably, we analyzed the activity of apoptotic factors in the retinal tissues. Notably, the expression of cleaved Caspase-3 was substantially suppressed by Mdivi-1 after RD (Fig. 2C & 2D). The Bcl-2 family is a critical regulator of mitochondrial permeability and intrinsic apoptotic pathway (Chipuk et al., 2010). Previous report has demonstrated a critical role of Bax, a member of the Bcl-2 family, in photoreceptor degeneration after RD (Yang et al., 2004). To test whether Bax is involved in Mdivi-1 mediated suppression of Caspase-3 activity, we further analyzed the expression level of Bax in the retinal lysates after RD. As shown in Fig. 2C & 2D, Bax expression was upregulated significantly after RD, while Mdivi-1 treatment substantially attenuated Bax activity. Both Drp1 and Bax are cytoplasmic proteins that translocate onto mitochondria membrane upon activation (Frank et al., 2001)(Große et al., 2016). To this end, we extracted the mitochondrial fraction from the retinal lysate and found that both activated Drp1 and Bax protein in mitochondria were substantially attenuated (Fig. 2E & 2F).

287 Based on the inhibitory effect of Mdivi-1 on the mitochondrial fission and  
 288 apoptotic pathways, we further assessed the therapeutic potential of Mdivi-1 in  
 289 experimental RD model. After RD, progressive degeneration of photoreceptors results  
 290 in a gradual thinning of the outer nuclear layer (ONL). Therefore, the thickness of  
 291 ONL serves as an indicator of photoreceptor survival. As showed in Fig. 3A and 3B,  
 292 RD induced substantial loss of photoreceptors while Mdivi-1 treatment effectively  
 293 preserved the ONL structure in the retina. Consistently, the retinal function was  
 294 significantly rescued with Mdivi-1 treatment as examined by scotopic  
 295 electroretinogram (Fig. 3C, 3D).

296 Taken together, we conclude that Drp1 inhibition by Mdivi-1 has a  
 297 neuroprotective impact on the retina in experimental RD model by suppressing  
 298 mitochondrial fission and the apoptotic pathway.

299

### 300 **Drp1-mediated mitochondrial fission is induced by oxidative stress**

301 Oxidative stress has been well documented as a ‘danger signal’ to photoreceptors.  
 302 Accordingly, alleviation of oxidative stress protects photoreceptors after RD (Roh et  
 303 al., 2011). Previous studies indicated potential correlations between oxidative stress  
 304 and mitochondrial fission (Yu et al., 2014). However, their causal relationship remains  
 305 to be explored. Therefore, we questioned whether attenuation of oxidative stress  
 306 would have an effect on mitochondrial dynamics in photoreceptors after RD. To this  
 307 end, we introduced N-Acetylcysteine (NAC), a well-defined scavenger of reactive  
 308 oxygen species (ROS), subretinally at the time of RD induction and examined the

309 expression level of activated Drp1. As showed in Fig. 4A-4B, NAC effectively  
310 suppressed the expression of p-Drp1, indicating a positive role of oxidative stress in  
311 promoting mitochondrial fission.

312 To further elucidate the causal relationship between oxidative stress and  
313 mitochondrial fission, we employed an in vitro model of cultured murine  
314 photoreceptor-derived 661W cell line challenged by H<sub>2</sub>O<sub>2</sub>. Consistent with what we  
315 found in vivo, H<sub>2</sub>O<sub>2</sub> insult activated Drp1 as showed in Fig. 4C & 4D.  
316 Immunostaining of 661W cells with mitochondria-specific V-β antibodies revealed  
317 predominance of fragmented mitochondrial signals after H<sub>2</sub>O<sub>2</sub> insult (Fig. 4E & 4F),  
318 which is in agreement with our vivo findings (Fig. 4A). Consistently, Drp1  
319 knockdown by siRNA (Fig. 4G & 4H) also preserved mitochondrial integrity (Fig. 4E  
320 & 4F), confirming the critical role of Drp1.

321

### 322 **Drp1 inhibition suppresses oxidative stress induced degenerative signals**

323 H<sub>2</sub>O<sub>2</sub> insult upregulated intracellular ROS level of cultured 661W cells and cell  
324 degeneration, while, inhibition of Drp1 activity by Mdivi-1 or siRNAs effectively  
325 suppressed H<sub>2</sub>O<sub>2</sub> induced TUNEL activity (Fig. 5A & 5B), Pre-treatment of 661W  
326 cells with Mdivi-1 effectively preserved mitochondrial integrity and membrane  
327 potential (Fig. 5C-5D), which supports a role of Drp1 in oxidative stress induced  
328 mitochondrial dysfunction. Our findings strongly suggest that Drp1 and  
329 Drp1-dependent pathways may join in preserving the mitochondrial function,  
330 Oxidative stress induced photoreceptor degeneration is at least in part mediated by

331 Drp1-dependent mitochondrial fission.

332

### 333 **Discussion**

334 Photoreceptors play pivotal roles in visual reception by a number of  
335 energy-demanding activities including phototransduction, resolution of light and  
336 oxygen-induced damage, synthesis and replenishment of disc membranes, etc (Ahmed  
337 et al., 1993). Therefore, photoreceptors necessitate sustained supply of oxygen and  
338 nutrition from the RPE/choroid complex to support highly active metabolism  
339 (Linsenmeier and Padnick-Silver, 2000)(Luo et al., 2013). Accordingly,  
340 photoreceptors hold a large reservoir of mitochondria to satisfy their metabolic  
341 demand(Barber and Wright, 1969). It has been reported that increased mitochondrial  
342 fission is associated with photoreceptor degeneration in aged mice(Kam et al., 2015).  
343 Moreover, mitochondrial abnormality correlates with photoreceptor degeneration in  
344 acute glucose deprivation model.(Chertov et al., 2011) However, the relationship  
345 between mitochondrial abnormality and photoreceptor death remains unknown.

346 In the case of RD as manifested in multiple retinal diseases, photoreceptors  
347 suffer from excessive ROS that is considered to trigger cell death, but the exact  
348 mechanisms remain to be elucidated. Accumulating evidence suggests that  
349 mitochondria is the major source of intracellular ROS in response to cellular  
350 stress(Sies, 2014). Consistently, we observed a predominantly fissured population of  
351 mitochondria in the photoreceptors of rats after experimental RD, which represents an  
352 early degenerative event (Fig.1E & 1F). Since fissured mitochondria has been



353 associated with energetic failure and cell degeneration (Cherubini and Ginés, 2017),  
 354 we speculate that mitochondrial fission could be the milestone along the ROS-induced  
 355 degenerative pathway determining photoreceptor death. At the molecular level, Drp1,  
 356 the key mediator of mitochondrial fission, was activated after RD. Notably, inhibition  
 357 of ROS suppressed Drp1 activation, which supports a regulatory role of ROS in Drp1  
 358 activity. In vitro, H<sub>2</sub>O<sub>2</sub> induced Drp1 activation, mitochondrial fission and  
 359 photoreceptor death, while inhibition of Drp1 preserved mitochondrial integrity and  
 360 protected photoreceptors. Collectively, our data suggest that Drp1-dependent  
 361 mitochondrial fission plays key roles in mediating RD-induced photoreceptor  
 362 degeneration.

363 It is intriguing to target mitochondria for photoreceptor protection since  
 364 mitochondria are considered to be the major organelles that senses cellular stress and  
 365 broadcasts death-promoting signals. Mitochondrial fission may represent a common  
 366 pathway through which photoreceptors degenerate in other retinal diseased models. In  
 367 conclusion, our findings suggest that Drp1-dependent mitochondrial fission plays  
 368 critical roles in photoreceptor degeneration and Drp1 inhibition is effective in  
 369 preserving photoreceptors. Thus, Drp1 represents a potential therapeutic target for  
 370 photoreceptor protection.

371

## 372 **Acknowledgments**

373 We thank Dr. Yu Chen (Yueyang Hospital, Shanghai University of Traditional Chinese  
 374 Medicine) for providing the 661W photoreceptor cell line.

375

376 **Conflict of interests:** the authors declare no competing interest.

377

378 **Funding:** This work was supported by National Science Fund for Distinguished  
 379 Young Scholars (81425006), National Natural Science Foundation of China  
 380 (81470640), Science and Technology Commission of Shanghai  
 381 Municipality (16dz2251500, 16140900800), Shanghai Pujiang Program  
 382 (16PJ1408500), Program for Eastern Young Scholar at Shanghai Institutions of  
 383 Higher Learning (QD2016003), Translational Medicine Innovation Fund of Shanghai  
 384 Jiao Tong University School of Medicine (15ZH4005).

385

## 386 **References**

- 387 **Ahmed, J., Braun, R. D., Dunn, R. and Linsenmeier, R. A.** (1993). Oxygen distribution in the  
 388 macaque retina. *Investigative Ophthalmology and Visual Science* **34**, 516–521.
- 389 **Archer, S. L.** (2013). Mitochondrial Dynamics - mitochondrial fission and fusion in human diseases.  
 390 *New England Journal of Medicine* **369**, 2236–2251.
- 391 **Arroyo, J. G., Yang, L., Bula, D. and Chen, D. F.** (2005). Photoreceptor apoptosis in human retinal  
 392 detachment. *American journal of ophthalmology* **139**, 605–10.
- 393 **Ballweg, K., Mutze, K., Königshoff, M., Eickelberg, O. and Meiners, S.** (2014). Cigarette smoke  
 394 extract affects mitochondrial function in alveolar epithelial cells. *American journal of physiology.*  
 395 *Lung cellular and molecular physiology* **307**, L895-907.
- 396 **Barber, V. C. and Wright, D. E.** (1969). The fine structure of the eye and optic tentacle of the mollusc  
 397 *Cardium edule*. *Journal of ultrastructure research* **26**, 515–528.
- 398 **Besirli, C. G., Chinskey, N. D., Zheng, Q. D. and Zacks, D. N.** (2010). Inhibition of retinal  
 399 detachment-induced apoptosis in photoreceptors by a small peptide inhibitor of the Fas receptor.  
 400 *Investigative Ophthalmology and Visual Science* **51**, 2177–2184.
- 401 **Bhatt, L., Groeger, G., McDermott, K. and Cotter, T. G.** (2010). Rod and cone photoreceptor cells  
 402 produce ROS in response to stress in a live retinal explant system. *Molecular vision* **16**, 283–293.
- 403 **Chertov, A. O., Holzhausen, L., Kuok, I. T., Couron, D., Parker, E., Linton, J. D., Sadilek, M.,**  
 404 **Sweet, I. R. and Hurley, J. B.** (2011). Roles of glucose in photoreceptor survival. *Journal of*  
 405 *Biological Chemistry* **286**, 34700–34711.
- 406 **Cherubini, M. and Ginés, S.** (2017). Mitochondrial fragmentation in neuronal degeneration: Toward an

understanding of HD striatal susceptibility. *Biochemical and Biophysical Research Communications* **483**, 1063–1068.

**Chipuk, J. E., Moldoveanu, T., Llambi, F., Parsons, M. J. and Green, D. R.** (2010). The BCL-2 Family Reunion. *Molecular Cell* **37**, 299–310.

**Dong, K., Zhu, H., Song, Z., Gong, Y., Wang, F., Wang, W., Zheng, Z., Yu, Z., Gu, Q., Xu, X., et al.** (2012). Necrostatin-1 protects photoreceptors from cell death and improves functional outcome after experimental retinal detachment. *American Journal of Pathology* **181**, 1634–1641.

**Frank, S., Gaume, B., Bergmann-Leitner, E. S., Leitner, W. W., Robert, E. G., Catez, F., Smith, C. L. and Youle, R. J.** (2001). The Role of Dynamin-Related Protein 1, a Mediator of Mitochondrial Fission, in Apoptosis. *Developmental Cell* **1**, 515–525.

**Große, L., Wurm, C. A., Brüser, C., Neumann, D., Jans, D. C. and Jakobs, S.** (2016). Bax assembles into large ring-like structures remodeling the mitochondrial outer membrane in apoptosis. *The EMBO journal* **35**, 402–413.

**Huang, Q., Li, J., Xing, J., Li, W., Li, H., Ke, X., Zhang, J., Ren, T., Shang, Y., Yang, H., et al.** (2014). CD147 promotes reprogramming of glucose metabolism and cell proliferation in HCC cells by inhibiting the p53-dependent signaling pathway. *Journal of Hepatology*.

**Ishihara, N., Nomura, M., Jofuku, A., Kato, H., Suzuki, S. O., Masuda, K., Otera, H., Nakanishi, Y., Nonaka, I., Goto, Y., et al.** (2009). Mitochondrial fission factor Drp1 is essential for embryonic development and synapse formation in mice. *Nature Cell Biology* **11**, 958–966.

**Kam, J. H., Jeffery, G., Hoh Kam, J. and Jeffery, G.** (2015). To unite or divide: mitochondrial dynamics in the murine outer retina that preceded age related photoreceptor loss. *Oncotarget* **6**, 26690–26701.

**Kashatus, J. A., Nascimento, A., Myers, L. J., Sher, A., Byrne, F. L., Hoehn, K. L., Counter, C. M. and Kashatus, D. F.** (2015). Erk2 phosphorylation of Drp1 promotes mitochondrial fission and MAPK-driven tumor growth. *Molecular Cell* **57**, 537–552.

**Lim, L. S., Mitchell, P., Seddon, J. M., Holz, F. G. and Wong, T. Y.** (2012). Age-related macular degeneration. *The Lancet* **379**, 1728–1738.

**Linsenmeier, R. A. and Padnick-Silver, L.** (2000). Metabolic dependence of photoreceptors on the choroid in the normal and detached retina. *Investigative Ophthalmology and Visual Science* **41**, 3117–3123.

**Liu, H., Qian, J., Wang, F., Sun, X., Xu, X., Xu, W. and Zhang, X.** (2009). Expression of two endoplasmic reticulum stress markers, GRP78 and GADD153, in rat retinal detachment model and its implication. *Eye* **24**, 137–144.

**Luo, L., Uehara, H., Zhang, X., Das, S. K., Olsen, T., Holt, D., Simonis, J. M., Jackman, K., Singh, N., Miya, T. R., et al.** (2013). Photoreceptor avascular privilege is shielded by soluble VEGF receptor-1. *eLife* **2013**.

**Murakami, Y., Notomi, S., Hisatomi, T., Nakazawa, T., Ishibashi, T., Miller, J. W. and Vavvas, D. G.** (2013). Photoreceptor cell death and rescue in retinal detachment and degenerations. *Progress in Retinal and Eye Research* **37**, 114–140.

**Nakanishi, S.** (1995). 2nd-Order Neurons and Receptor Mechanisms in Visual-Information and Olfactory-Information Processing. *Trends in Neurosciences* **18**, 359–364.

**Okawa, H., Sampath, A. P., Laughlin, S. B. and Fain, G. L.** (2008). ATP Consumption by Mammalian Rod Photoreceptors in Darkness and in Light. *Current Biology* **18**, 1917–1921.

**Picard, M., Shirihai, O. S., Gentil, B. J. and Burelle, Y.** (2013). Mitochondrial morphology transitions

and functions: implications for retrograde signaling? *AJP: Regulatory, Integrative and Comparative Physiology* **304**, R393–R406.

**Rehman, J., Zhang, H. J., Toth, P. T., Zhang, Y., Marsboom, G., Hong, Z., Salgia, R., Husain, A. N., Wietholt, C. and Archer, S. L.** (2012). Inhibition of mitochondrial fission prevents cell cycle progression in lung cancer. *The FASEB Journal* 1–12.

**Roh, M. I., Murakami, Y., Thanos, A., Vavvas, D. G. and Miller, J. W.** (2011). Edaravone, an ROS scavenger, ameliorates photoreceptor cell death after experimental retinal detachment. *Investigative Ophthalmology and Visual Science* **52**, 3825–3831.

**Sies, H.** (2014). Role of metabolic H<sub>2</sub>O<sub>2</sub> generation: Redox signaling and oxidative stress. *Journal of Biological Chemistry* **289**, 8735–8741.

**Tanaka, A. and Youle, R. J.** (2008). A Chemical Inhibitor of DRP1 Uncouples Mitochondrial Fission and Apoptosis. *Molecular Cell* **29**, 409–410.

**Trichonas, G., Murakami, Y., Thanos, A., Morizane, Y., Kayama, M., Debouck, C. M., Hisatomi, T., Miller, J. W. and Vavvas, D. G.** (2010). Receptor interacting protein kinases mediate retinal detachment-induced photoreceptor necrosis and compensate for inhibition of apoptosis. *Proceedings of the National Academy of Sciences of the United States of America* **107**, 21695–21700.

**Vakifahmetoglu-Norberg, H., Ouchida, A. T. and Norberg, E.** (2017). The role of mitochondria in metabolism and cell death. *Biochemical and Biophysical Research Communications* **482**, 426–431.

**Wang, L., Yu, T., Lee, H., O'Brien, D. K., Sesaki, H. and Yoon, Y.** (2015). Decreasing mitochondrial fission diminishes vascular smooth muscle cell migration and ameliorates intimal hyperplasia. *Cardiovascular Research* **106**, 272–283.

**Westermann, B.** (2010). Mitochondrial fusion and fission in cell life and death. *Nature reviews. Molecular cell biology* **11**, 872–84.

**Wubben, T. J., Besirli, C. G. and Zacks, D. N.** (2016). Pharmacotherapies for Retinal Detachment. *Ophthalmology* **123**, 1553–1562.

**Yang, L., Bula, D., Arroyo, J. G. and Chen, D. F.** (2004). Preventing Retinal Detachment-Associated Photoreceptor Cell Loss in Bax-Deficient Mice. *Investigative Ophthalmology and Visual Science* **45**, 648–654.

**Yu, T., Wang, L., Lee, H., O'Brien, D. K., Bronk, S. F., Gores, G. J. and Yoon, Y.** (2014). Decreasing mitochondrial fission prevents cholestatic liver injury. *Journal of Biological Chemistry* **289**, 34074–34088.

## Figure Legends

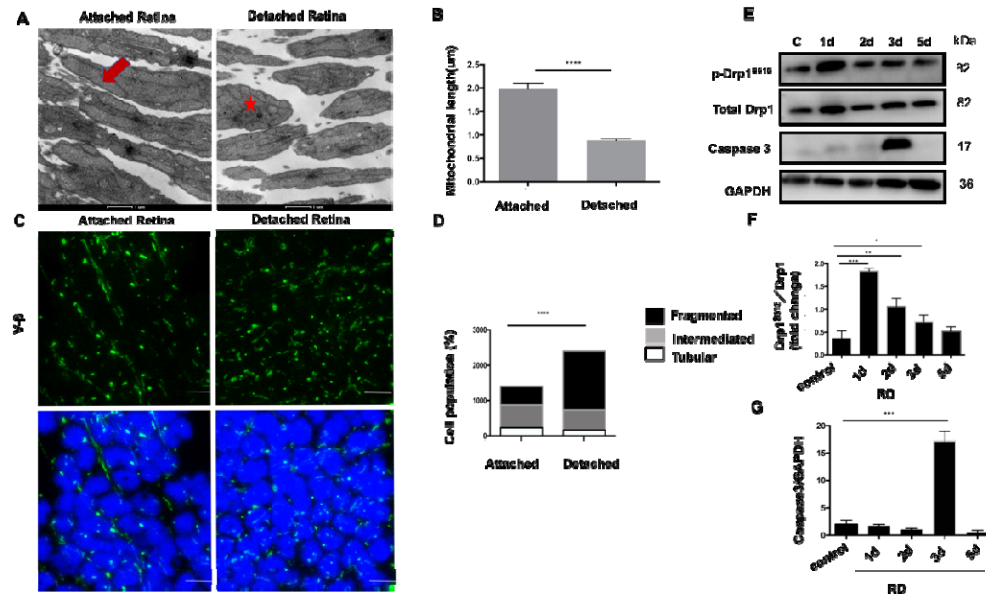

486

487 **Fig.1 Mitochondrial dynamic changes in the detached retina.** (A) Representative  
488 TEM images showed mitochondrial network of photoreceptors in attached retina and  
489 detached retina 3days after RD. Arrow, star mark tubular and fragmented  
490 mitochondrial species, respectively; Scale bar: 1μm. (B) Quantification of  
491 mitochondrial length in photoreceptors, mitochondrial length become shorter after RD,  
492 \*\*\*\* $P < 0.0001$ , independent t test, 3 independent experiments. (C) Mitochondrial  
493 network of the photoreceptors was labeled with V-β antibodies and assessed by  
494 confocal microscopy in attached and detached retina 3 days after RD. Greater than  
495 half of mitochondrial displaying the long tubular shape is “tubular”, less than half of  
496 mitochondrial displaying the tubular shape is intermediate and majority of  
497 mitochondrial displaying short is fragmented shape; Scale bars: 5μm. (D)  
498 Quantification of mitochondrial morphology by Image J, (cell number =100), the  
499 fragmentation was defined as the percentage of fragmented mitochondrial in total

cells, fragmented mitochondrial ratio increased after RD, \*\*\*\* $P < 0.0001$ , Chi-square test, 3 independent experiments. (E-G) Western blot analysis of retinal lysates after RD (n=3 for each group), quantification indicates that mitochondrial fission protein Drp1<sup>S616</sup> increased and peaked 1 day after RD, \*\*\*\* $P < 0.0001$ , caspase-3 increased and peaked 3 days after RD, \*\*\*\* $P < 0.0001$ , ANOVA with Bonferroni coefficient, 3 independent experiments.

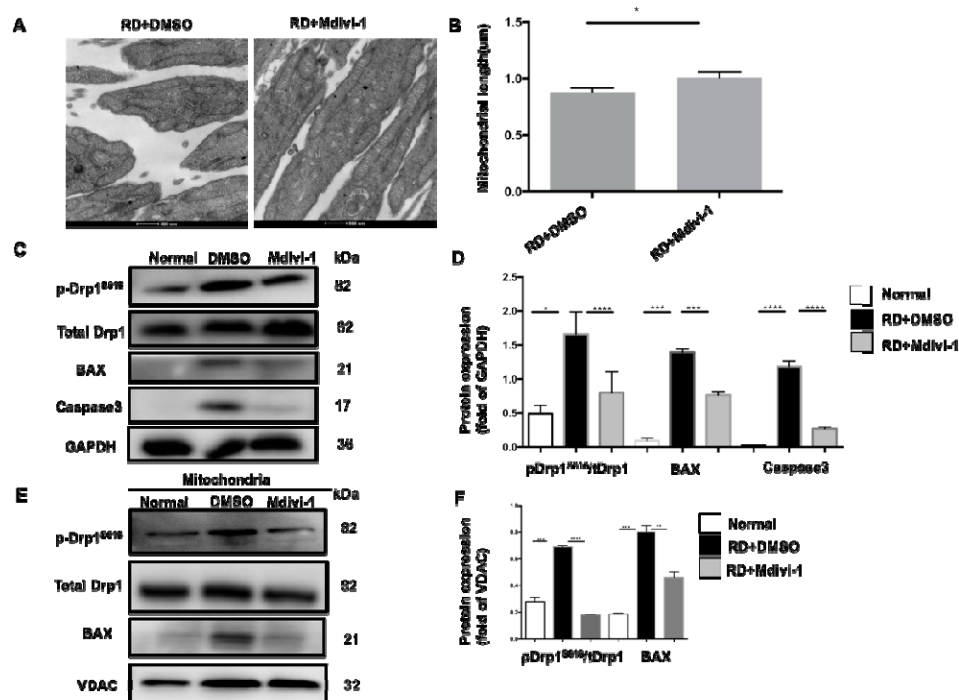

**Fig. 2. Inhibition of Drp1 protects the photoreceptors by suppressing intrinsic apoptosis way.** (A-B) Representative TEM images of the mitochondria of photoreceptors in RD and RD treated group at 3 days after RD, the mitochondrial length in treated group is longer than DMSO group; Scale bar: 500nm; \* $P = 0.026$ , independent t test, 3 independent experiments. (C-D) Western blot analysis of the retinal lysates with Mdivi-1 treatment 3 days after RD (n=3), GAPDH was used as

internal control for analysis, Drp1<sup>S616</sup>/tDrp1, caspas3 and Bax decreased with Mdivi-1 treatment, \*\*\*\* $P < 0.0001$ , ANOVA with Bonferroni coefficient, 3 independent experiments; (E-F) Western blot analysis of the mitochondrial fraction with Mdivi-1 treatment 3 days after RD (n=3). VDAC was used as a marker for mitochondria and as internal control. Quantification indicates that p-Drp1, BAX decreased compared with DMSO group; \*\*\*\* $P < 0.0001$ , \*\*\* $p = 0.0046$ , ANOVA with Bonferroni coefficient, 3 independent experiments.

521

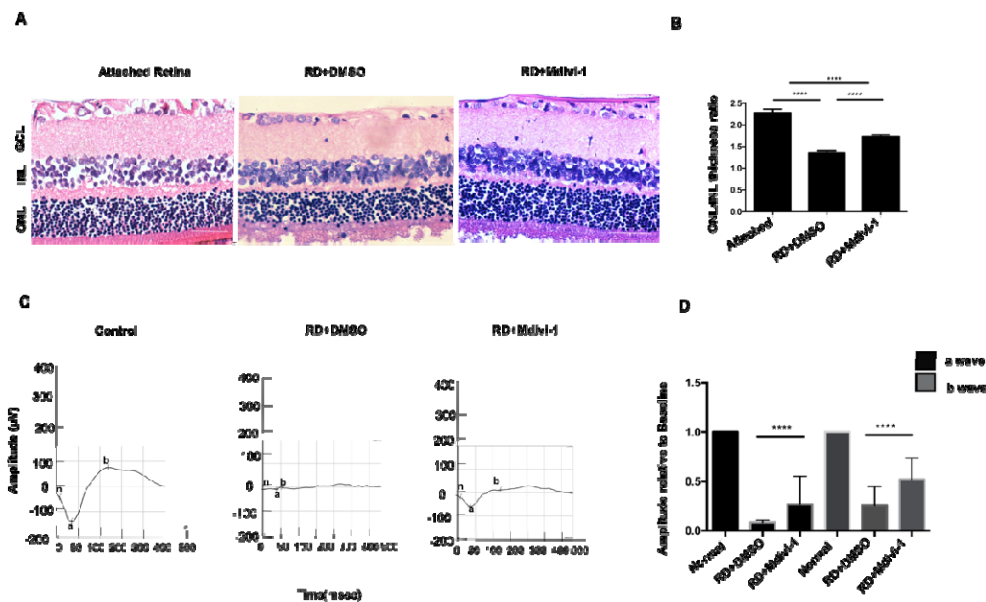

522

523 **Fig.3. Inhibition of Drp1 attenuated retina function after retinal detachment.**

524 (A-B) Representative H&E stained retinal sections showed outer segment of the retina  
525 7 days after RD. The thickness of ONL normalized to that of INL was used as  
526 indication of photoreceptor survival. Mdivi-1 treatment group preserved the ONL/INL  
527 thickness ratio 7 days after RD (n=3), 3 independent experiments, \*\* $P = 0.0061$  using  
528 ANOVA with Bonferroni coefficient. Scale bars: 50um; (C-D) Mdivi-1 treated group



529 increases the functional recovery of scotopic electroretinogram 7 days after RD, C  
530 representatives scotopic electroretinogram waveforms from baseline, DMSO and  
531 Mdivi-1 treated group (n=3). The a or b wave relative to baseline increased after  
532 Mdivi-1 treatment, \*\*\*\* $P < 0.001$ , using ANOVA with Bonferroni coefficient, 3  
533 independent experiments.  
534

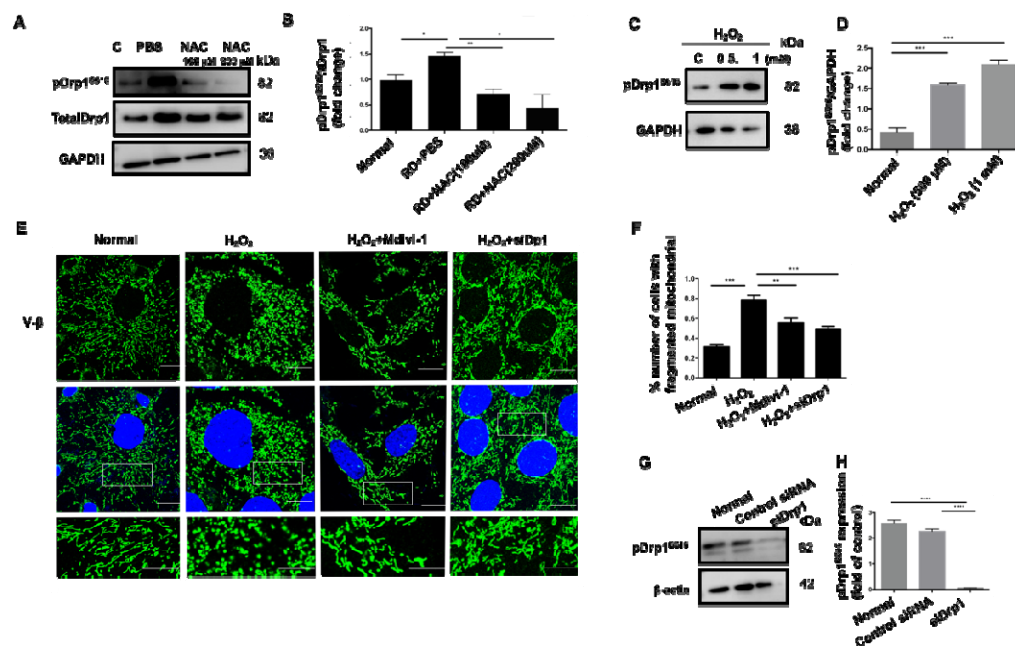

535  
536 **Fig. 4. Oxidative stress induced mitochondrial fission.** (A-B) Western blot analysis  
537 of pDrpS<sup>616</sup>/tDrp1 in retinal lysates 3 days after RD and NAC treatment(n=3).  
538 Quantification results indicate that NAC treated group decreased the pDrpS<sup>616</sup>/tDrp1  
539 expression, GAPDH was used as internal control, \* $P = 0.0212$ , \*\*\* $P = 0.0031$ , \* $P$   
540  $= 0.0213$ , using ANOVA with Bonferroni coefficient, 3 independent experiments.  
541 (C-D) Representative western blot of pDrpS<sup>616</sup> in different H<sub>2</sub>O<sub>2</sub> concentrations  
542 insulted 661W cells for 24 hours; Quantification results indicate that pDrpS<sup>616</sup>



increased after H<sub>2</sub>O<sub>2</sub> treatment, GAPDH was used as internal control; \*\*\**P*=0.002, \*\*\**P*=0.002, respectively, 3 independent experiments. (E-F) 500 μM H<sub>2</sub>O<sub>2</sub> was induced in 661W cells for 24 hours, morphology of mitochondria was imaged by confocal microscopy and quantitated with Image J (n=100). H<sub>2</sub>O<sub>2</sub> increased mitochondrial fragmentation, \*\*\*\**P*<0.0001 for H<sub>2</sub>O<sub>2</sub> VS normal group, however Mdivi-1 or siDrp1 reduced the effect, \*\**P*=0.0052 for H<sub>2</sub>O<sub>2</sub> VS Mdivi-1 treated group, \*\*\**P*<0.0001 H<sub>2</sub>O<sub>2</sub> VS for siDrp1, Chi-square test. Scale bar: 10um. 3 independent experiments. (G-H) Representative western blot of siDrp1 after transfection; Quantification of p-Drp1<sup>Ser616</sup> normalized to β-actin in three groups (n=3), siDrp1 group decreased the p-Drp1<sup>Ser616</sup> expression; \*\*\*\**P*<0.0001, ANOVA with Bonferroni coefficient, the transfection efficiency is 91.5%, 3 independent experiments.

554

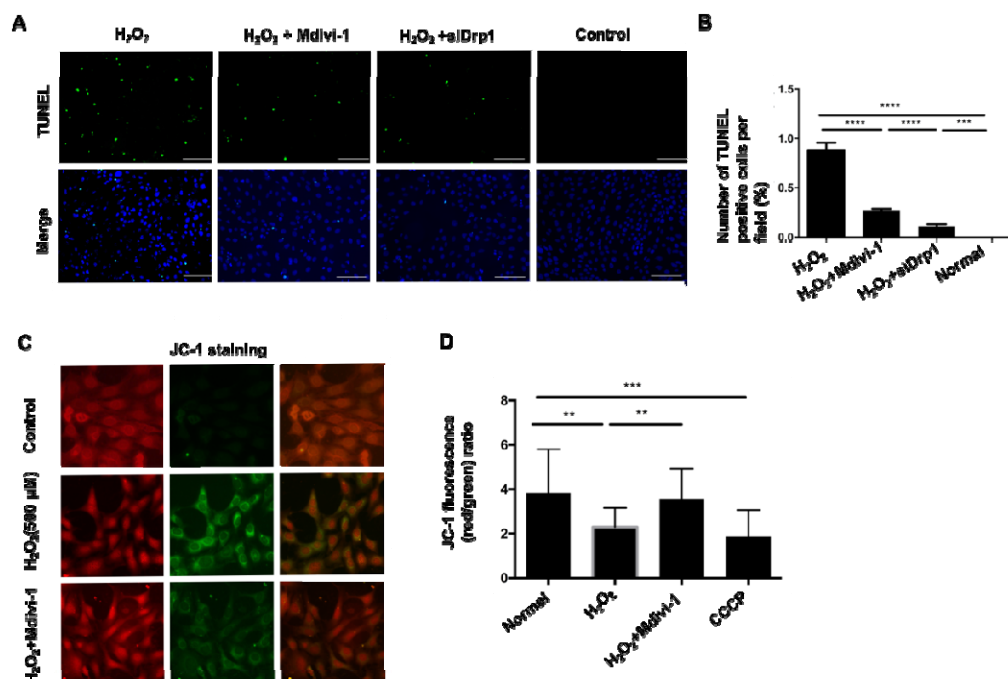

555

556 **Fig. 5. Inhibition of Drp1 suppresses apoptosis and protects 661W cells through**

557 **protecting mitochondrial integrity after H<sub>2</sub>O<sub>2</sub> insult. (A-B)** Representative TUNEL  
558 staining after treatment, either Mdivi-1 or siDrp1 was effective in rescuing 661W  
559 cells after 500  $\mu$ M H<sub>2</sub>O<sub>2</sub> insult for 24 hours. Quantification of TUNEL positive cells  
560 in total cells, \*\*\* $P=0.0002$  for Mdivi-1 VS H<sub>2</sub>O<sub>2</sub>, \*\*\* $P=0.0008$  for siDrp1 VS H<sub>2</sub>O<sub>2</sub>,  
561 ANOVA with Bonferroni coefficient, 3 independent experiments. **(C-D)**  
562 Representative mitochondrial membrane potential by JC-1 staining in different groups.  
563 JC-1 dye expresses red signals with high membrane potential and shifts to green  
564 fluorescence when mitochondria was decoupled. Quantification of red and green  
565 fluorescence intensity and calculated the red/green ratio after JC-1 staining in the  
566 H<sub>2</sub>O<sub>2</sub> induced model, Mdivi-1 rescued H<sub>2</sub>O<sub>2</sub>-induced loss of mitochondrial membrane  
567 potential and increased the red/ green ratio. Scale bar: 10 $\mu$ m. \*\* $P=0.0011$ , ANOVA  
568 with Bonferroni coefficient. 3 independent experiments.  
569

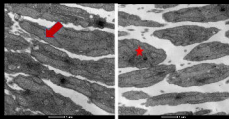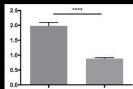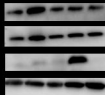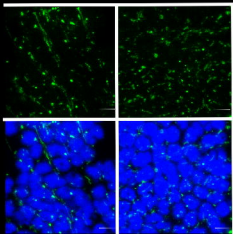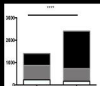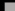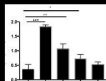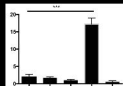

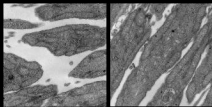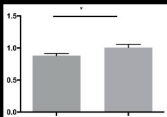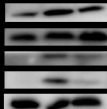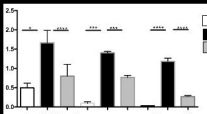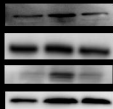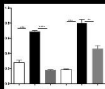

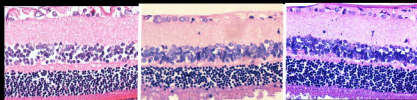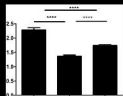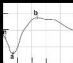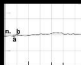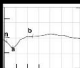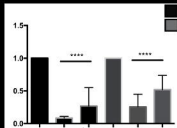

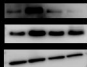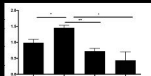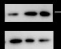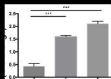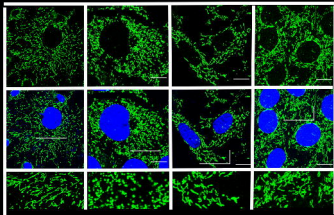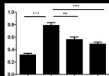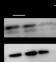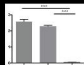

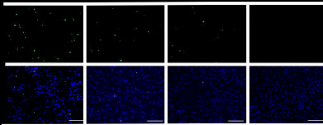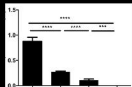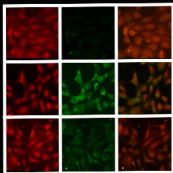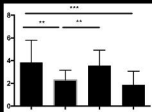

Source: http://biorxiv.org/content/10.1101/197467v1.full.pdf
